# Supplementary material
Source: Springer Nature journal article supplement (https://www.springermedizin.de/resource/supplementary/12889_2012_4142_MOESM1_ESM.pdf/9491742)
Supplement: MOESM1 [file 9491742]

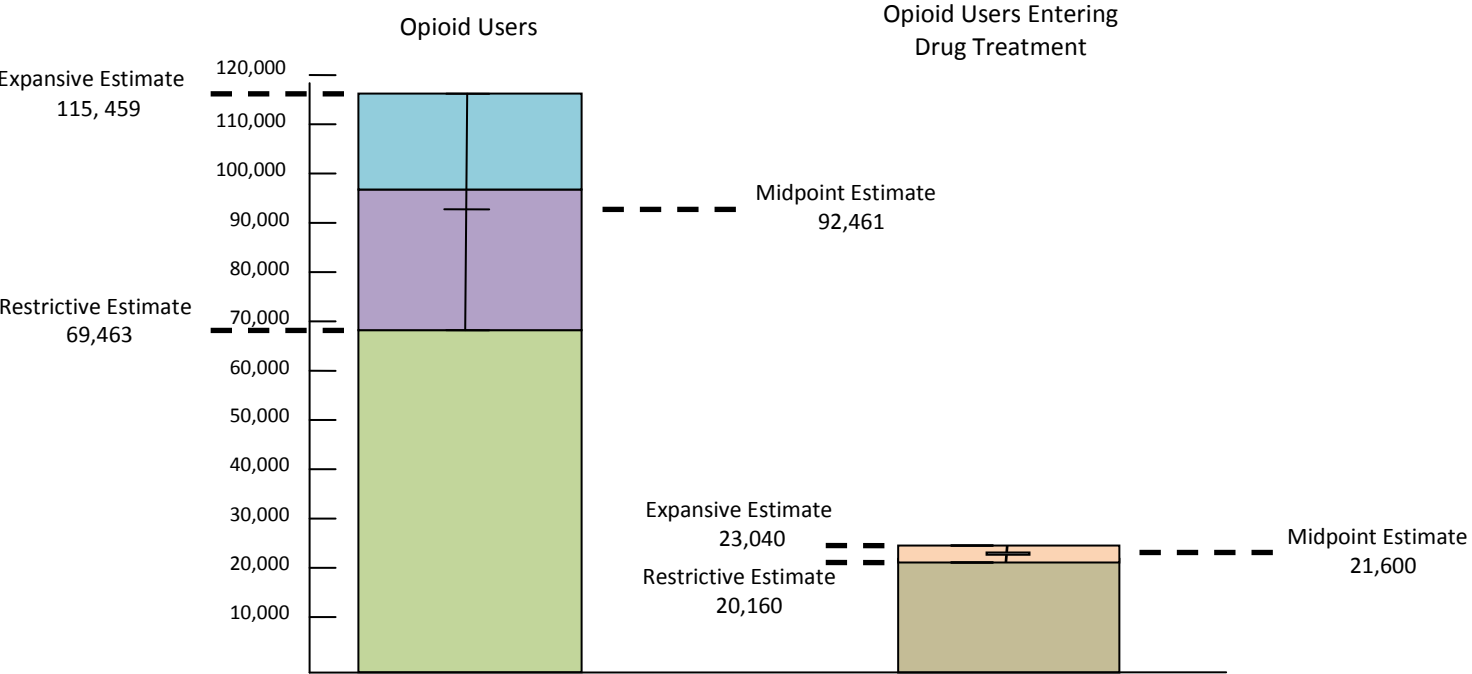

### Opioid User Subpopulations Midpoint Estimates

Medical Services (M) = 17,618

Buprenorphine Prescriptions (B) = 2,880

Drug Services (D) = 28,378

Drug Treatment Programs (P) = 20,160

General Population (G) = 69,463
